# Supplementary material for: Analysis of Errors and Winners in Men’s and Women’s Professional Padel
Source: MDPI journal article supplement (doi:10.3390/app12168125), 2022-08-13
Supplement: s1 [file s1]

| Season | Tournament            | Number of Matches per phase<br>(Nº Male + Nº Female) | Number of Sets<br>(Nº Male + Nº Female) | Links                                                                                                                                                                                                                                                              |
|--------|-----------------------|------------------------------------------------------|-----------------------------------------|--------------------------------------------------------------------------------------------------------------------------------------------------------------------------------------------------------------------------------------------------------------------|
| 2021   | WPT Valladolid Master | 6 Quarter Finals (4M+2F)                             | 14 (9M+5F)                              | <a href="https://www.youtube.com/watch?v=IOg_OytI8Xs">https://www.youtube.com/watch?v=IOg_OytI8Xs</a><br><a href="https://www.youtube.com/watch?v=ezqaiB795IY">https://www.youtube.com/watch?v=ezqaiB795IY</a>                                                     |
|        |                       | 4 Semi Finals (2M+2F)                                | 10 (5M+5F)                              | <a href="https://www.youtube.com/watch?v=iVhcNuElMTI&amp;t=5686s">https://www.youtube.com/watch?v=iVhcNuElMTI&amp;t=5686s</a><br><a href="https://www.youtube.com/watch?v=V99PyYwptOU&amp;t=7543s">https://www.youtube.com/watch?v=V99PyYwptOU&amp;t=7543s</a>     |
|        |                       | 2 Finals (1M+1F)                                     | 4 (2M+2F)                               | <a href="https://www.youtube.com/watch?v=HpR5bfvFuHA&amp;t=5846s">https://www.youtube.com/watch?v=HpR5bfvFuHA&amp;t=5846s</a>                                                                                                                                      |
|        | WPT Las Rozas Open    | 6 Quarter Finals (4M+2F)                             | 17 (11M+6F)                             | <a href="https://www.youtube.com/watch?v=XYDTuVbDKi4&amp;t=27728s">https://www.youtube.com/watch?v=XYDTuVbDKi4&amp;t=27728s</a><br><a href="https://www.youtube.com/watch?v=ZikK6l-q1Uw&amp;t=19221s">https://www.youtube.com/watch?v=ZikK6l-q1Uw&amp;t=19221s</a> |
|        |                       | 4 Semi Finals (2M+2F)                                | 10 (5M+5F)                              | <a href="https://www.youtube.com/watch?v=4ilOo8Gb-6l&amp;t=6468s">https://www.youtube.com/watch?v=4ilOo8Gb-6l&amp;t=6468s</a><br><a href="https://www.youtube.com/watch?v=tlu6yIMr6c8&amp;t=9468s">https://www.youtube.com/watch?v=tlu6yIMr6c8&amp;t=9468s</a>     |
|        |                       | 2 Finals (1M+1F)                                     | 4 (2M+2F)                               | <a href="https://www.youtube.com/watch?v=kawIT07Pb4k&amp;t=4694s">https://www.youtube.com/watch?v=kawIT07Pb4k&amp;t=4694s</a>                                                                                                                                      |
|        | WPT Malaga Open       | 6 Quarter Finals (4M+2F)                             | 16 (10M+6F)                             | <a href="https://www.youtube.com/watch?v=mEojtZeZ4E">https://www.youtube.com/watch?v=mEojtZeZ4E</a><br><a href="https://www.youtube.com/watch?v=-2ADeL5lDi8">https://www.youtube.com/watch?v=-2ADeL5lDi8</a>                                                       |
|        |                       | 3 Semi Finals (1M+2F)                                | 7 (2M+5F)                               | <a href="https://www.youtube.com/watch?v=64FNGfVKSJ8">https://www.youtube.com/watch?v=64FNGfVKSJ8</a><br><a href="https://www.youtube.com/watch?v=xDC2n52cyig&amp;t=6640s">https://www.youtube.com/watch?v=xDC2n52cyig&amp;t=6640s</a>                             |
|        |                       | 2 Finals (1M+1F)                                     | 4 (2M+2F)                               | <a href="https://www.youtube.com/watch?v=3yfkG5uWJU&amp;t=7283s">https://www.youtube.com/watch?v=3yfkG5uWJU&amp;t=7283s</a>                                                                                                                                        |
|        | WPT Cascais Master    | 6 Quarter Finals (4M+2F)                             | 14 (9M+5F)                              | <a href="https://www.youtube.com/watch?v=7sdhFREwvSE&amp;t=1195s">https://www.youtube.com/watch?v=7sdhFREwvSE&amp;t=1195s</a><br><a href="https://www.youtube.com/watch?v=WJhBJqojJvc&amp;t=1513s">https://www.youtube.com/watch?v=WJhBJqojJvc&amp;t=1513s</a>     |
|        |                       | 4 Semi Finals (2M+2F)                                | 8 (4M+4F)                               | <a href="https://www.youtube.com/watch?v=mMCrvHLiO54">https://www.youtube.com/watch?v=mMCrvHLiO54</a><br><a href="https://www.youtube.com/watch?v=OHZijgay10Y">https://www.youtube.com/watch?v=OHZijgay10Y</a>                                                     |
|        |                       | 2 Finals (1M+1F)                                     | 5 (3M+2F)                               | <a href="https://www.youtube.com/watch?v=fxOu9jpD-fM">https://www.youtube.com/watch?v=fxOu9jpD-fM</a>                                                                                                                                                              |
|        | WPT Sardegna Open     | 5 Quarter Finals (3M+2F)                             | 12 (7M+5F)                              | <a href="https://www.youtube.com/watch?v=hm4NpXRkZlk&amp;t=20553s">https://www.youtube.com/watch?v=hm4NpXRkZlk&amp;t=20553s</a><br><a href="https://www.youtube.com/watch?v=7p-F7bCoFVQ&amp;t=8535s">https://www.youtube.com/watch?v=7p-F7bCoFVQ&amp;t=8535s</a>   |
|        |                       | 4 Semi Finals (2M+2F)                                | 9 (5M+4F)                               | <a href="https://www.youtube.com/watch?v=gWidI84Bww0&amp;t=14832s">https://www.youtube.com/watch?v=gWidI84Bww0&amp;t=14832s</a><br><a href="https://www.youtube.com/watch?v=l1L02H0jU4Y">https://www.youtube.com/watch?v=l1L02H0jU4Y</a>                           |
|        |                       | 2 Finals (1M+1F)                                     | 5 (2M+3F)                               | <a href="https://www.youtube.com/watch?v=yzX431OAoII&amp;t=8596s">https://www.youtube.com/watch?v=yzX431OAoII&amp;t=8596s</a>                                                                                                                                      |
|        | WPT Barcelona Master  | 6 Quarter Finals (4M+2F)                             | 17 (11M+6F)                             | <a href="https://www.youtube.com/watch?v=wf7qtCL2wyM&amp;t=26472s">https://www.youtube.com/watch?v=wf7qtCL2wyM&amp;t=26472s</a><br><a href="https://www.youtube.com/watch?v=Qz9kx1Byi8M">https://www.youtube.com/watch?v=Qz9kx1Byi8M</a>                           |
|        |                       | 3 Semi Finals (2M+1F)                                | 7 (5M+2F)                               | <a href="https://www.youtube.com/watch?v=0iPWGxZF4lw">https://www.youtube.com/watch?v=0iPWGxZF4lw</a><br><a href="https://www.youtube.com/watch?v=-OMNuO8Y1WU&amp;t=3229s">https://www.youtube.com/watch?v=-OMNuO8Y1WU&amp;t=3229s</a>                             |
|        |                       | 2 Finals (1M+1F)                                     | 5 (3M+2F)                               | <a href="https://www.youtube.com/watch?v=INgTYrRJp0&amp;t=14950s">https://www.youtube.com/watch?v=INgTYrRJp0&amp;t=14950s</a>                                                                                                                                      |
